# Supplementary material for: Anionic Dye Removal by Polypyrrole-Modified Red Mud and Its Application to a Lab-Scale Column: Adsorption Performance and Phytotoxicity Assessment
Source: Hindawi journal article supplement (doi:10.1155/2021/7694783), 2021-01-01
Supplement: f1 [file 7694783.f1.docx]

**Anionic dyes removal by polypyrrole modified red mud and its application to a lab-scale column: adsorption performance and phytotoxicity assessment**

**Supplementary materials**

*Feng Zhang1#, Yue Yin1#, Chunlei Qiao1, Ya-nan Luan1, Mengyan Guo1, Yihua Xiao1, Changqing Liu1,2**

1. *School of Environmental and Municipal Engineering, Qingdao University of Technology, Qingdao 266033, China*
2. *Qingdao Research Center of Urban Water Environmental Pollution Control, Qingdao 266033, China*

**Captions**

**Fig. S1.** Laboratory column study schematic flow chart.

**Fig. S2.** Surface morphology of raw red mud (a) and PRM (b).

**Fig. S3.** FT-IR spectrum of raw red mud and PRM.

**Fig. S4**. Surface morphology and EDS of PRM after adsorption of MO (a, b) and CR (c, d).

**Fig. S5**. Detailed surface morphology of PRM after adsorption of MO (a-d) and CR (e-h) at different magnifications.


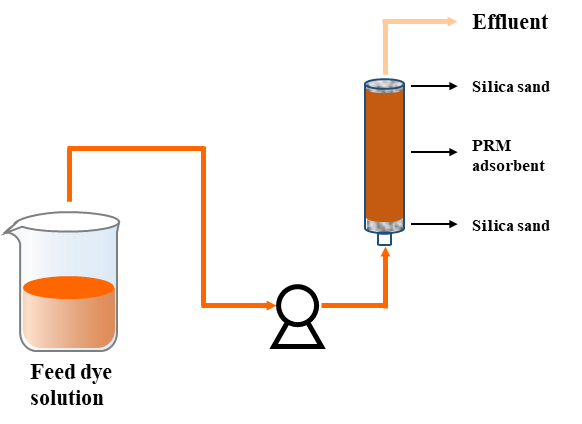


**Fig. S1.** Laboratory column study schematic flow chart.


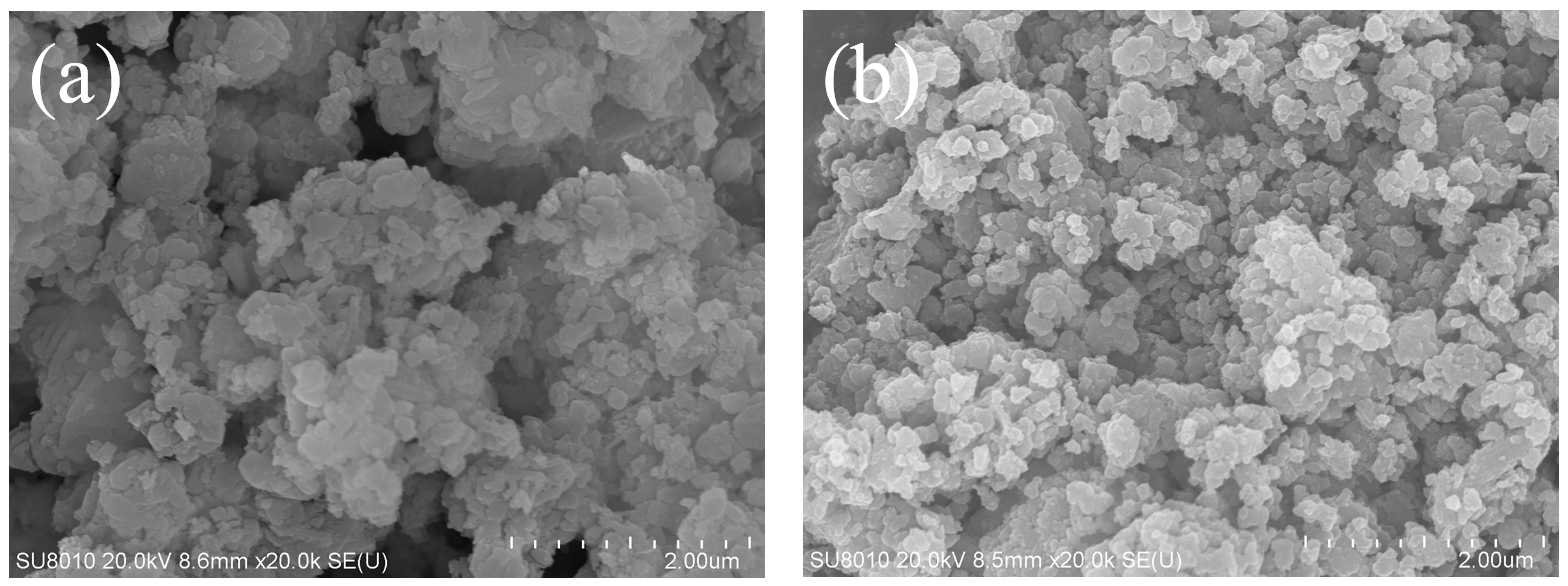


**Fig. S2**. Surface morphology of raw red mud (a) and PRM (b).


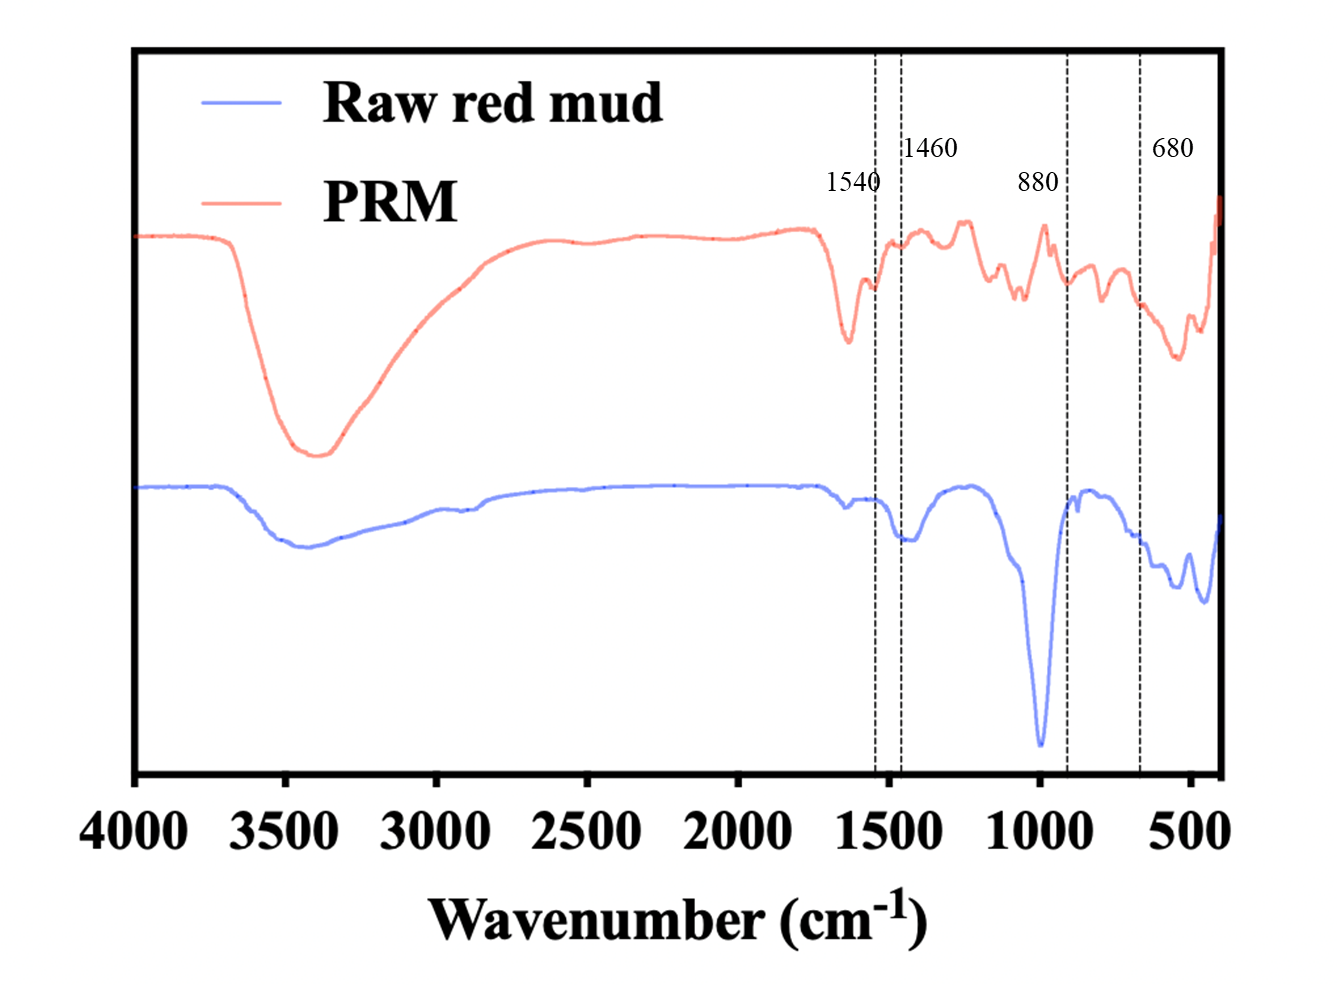


**Fig. S3**. T-IR spectrum of raw red mud and PRM.


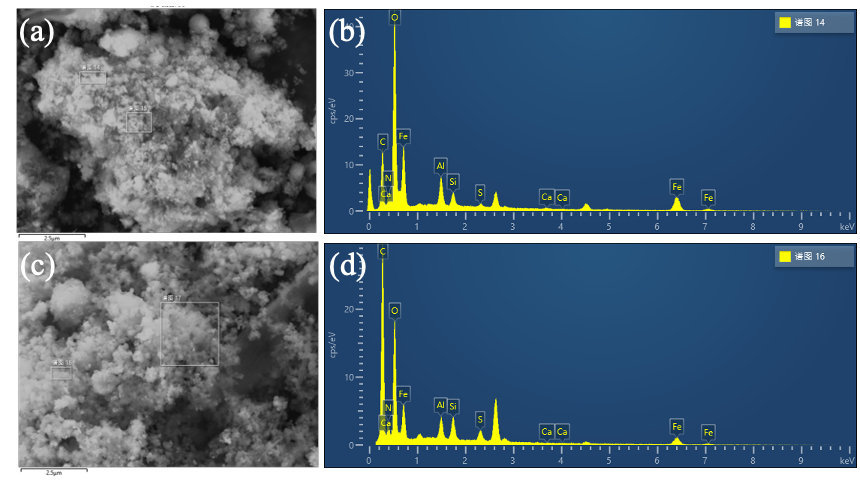


**Fig. S4**. Surface morphology and EDS of PRM after adsorption of MO (a, b) and CR (c, d).


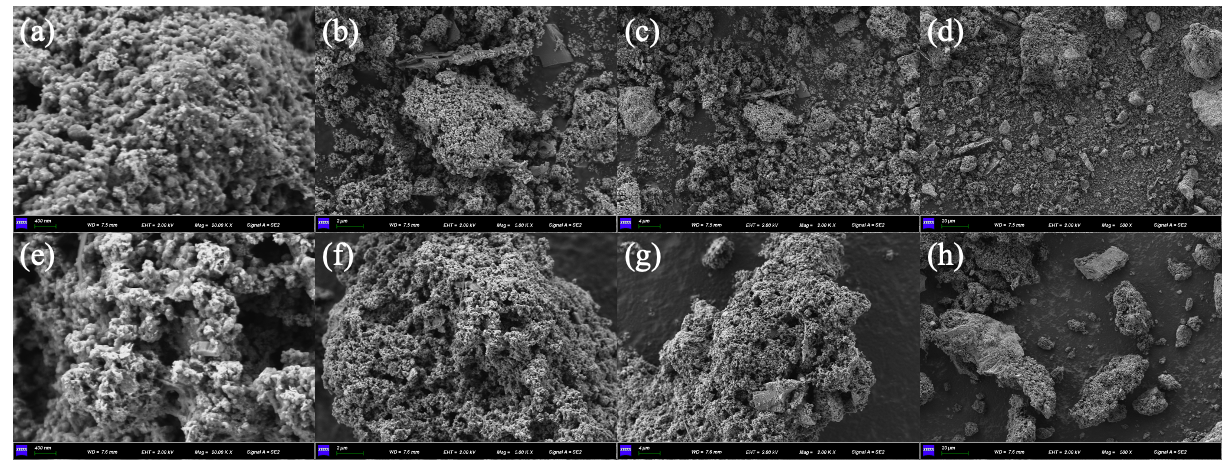


**Fig. S5**. Detailed surface morphology of PRM after adsorption of MO (a-d) and CR (e-h) at different magnifications.
